# Supplementary material for: High-Quality Genome Assembly, Genetic Transformation and Green Fluorescent Protein Labeling of <em>Lasiodiplodia theobromae </em>Strain LTTK16-3, a Fungal Pathogen of Chinese Hickory Canker
Source: Preprints.org preprint supplement (doi:10.20944/preprints202307.0260.v1), 2023-07-05
Supplement: Supplementary file 1 [file Supplementary Figure S1.docx]

**
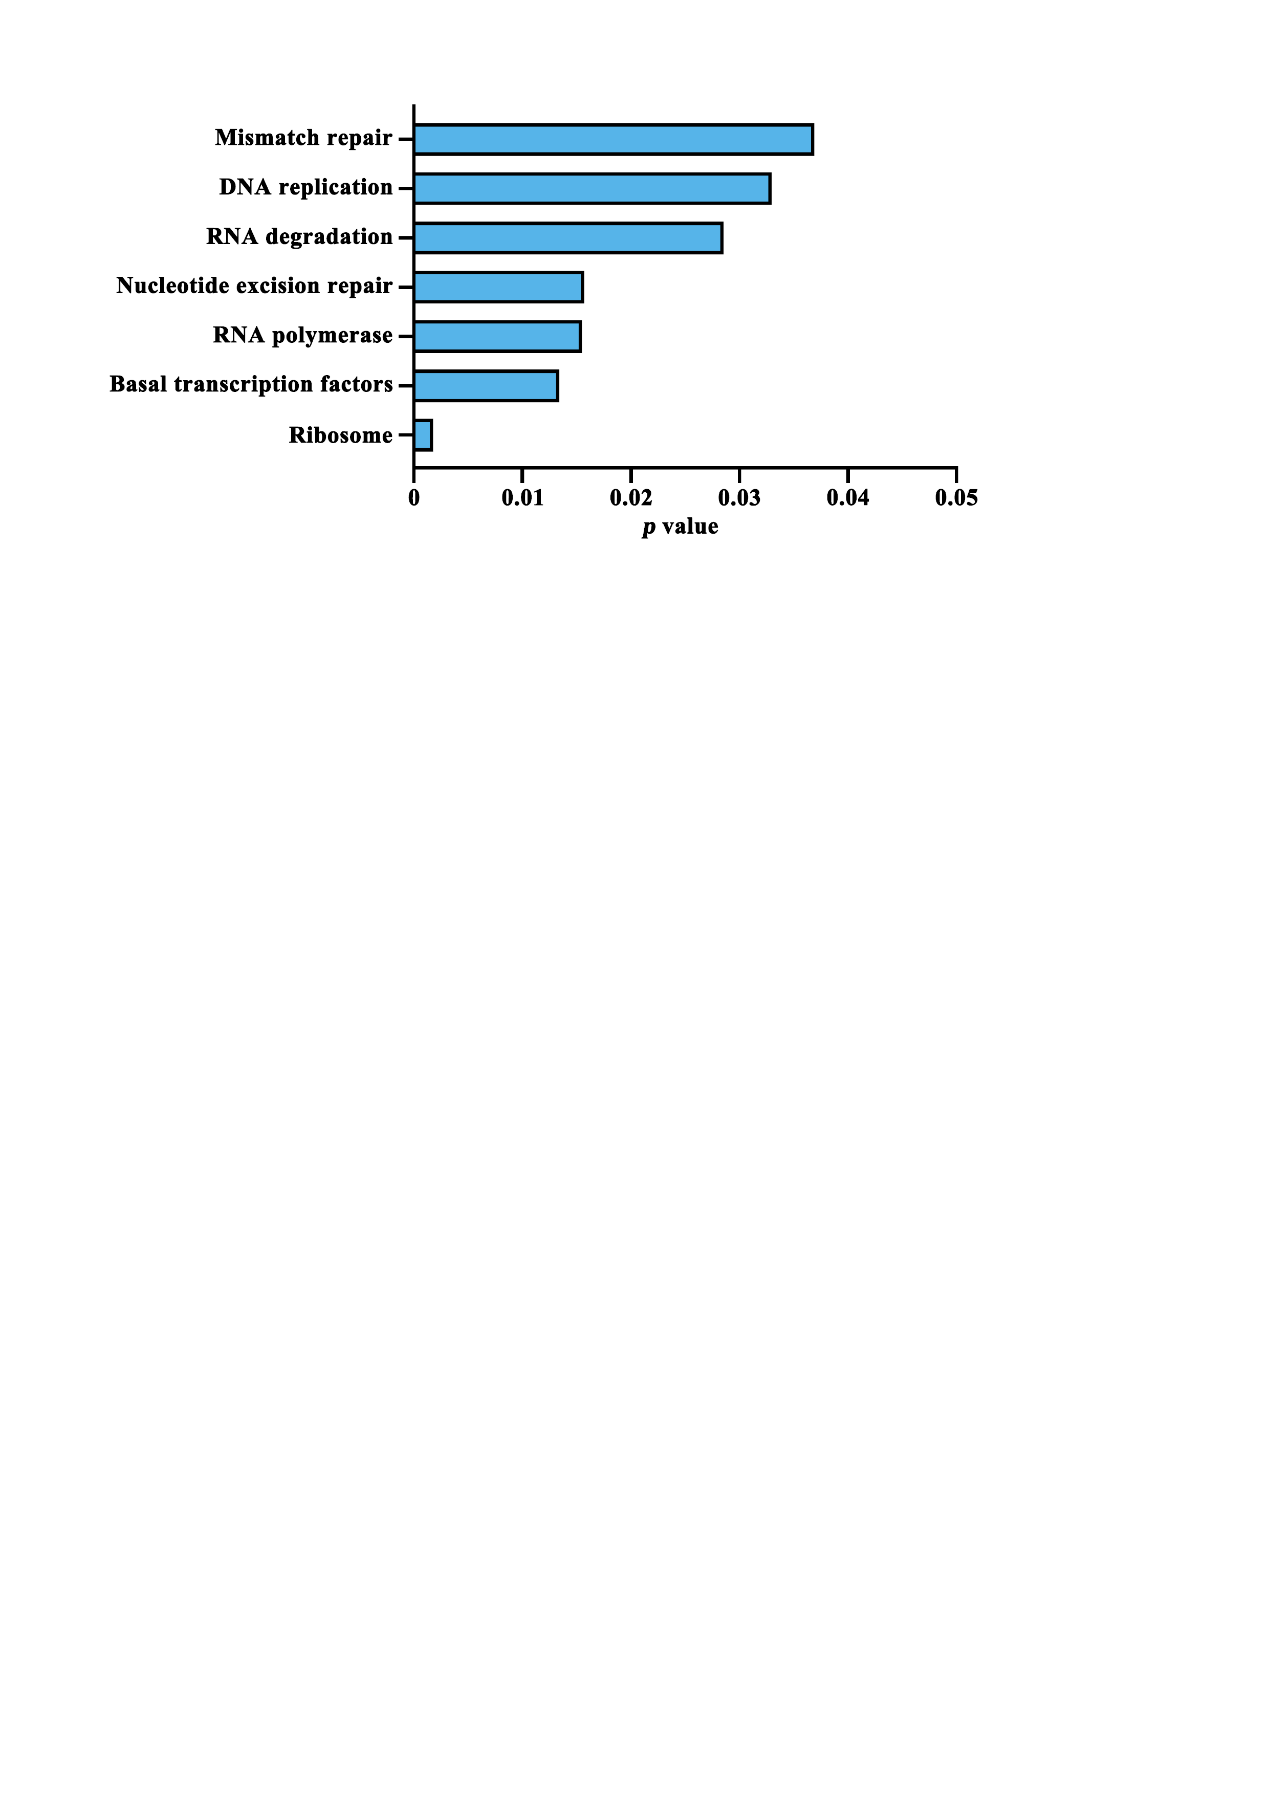
**

**Supplementary Figure S1** Enrichment of five *Botryosphaeriaceae* species core orthologous protein clusters on the KEGG pathways (p < 0.05).
