# Supplementary material for: High-Quality Genome Assembly, Genetic Transformation and Green Fluorescent Protein Labeling of <em>Lasiodiplodia theobromae </em>Strain LTTK16-3, a Fungal Pathogen of Chinese Hickory Canker
Source: Preprints.org preprint supplement (doi:10.20944/preprints202307.0260.v1), 2023-07-05
Supplement: Supplementary file 3 [file Supplementary Figure S2.docx]

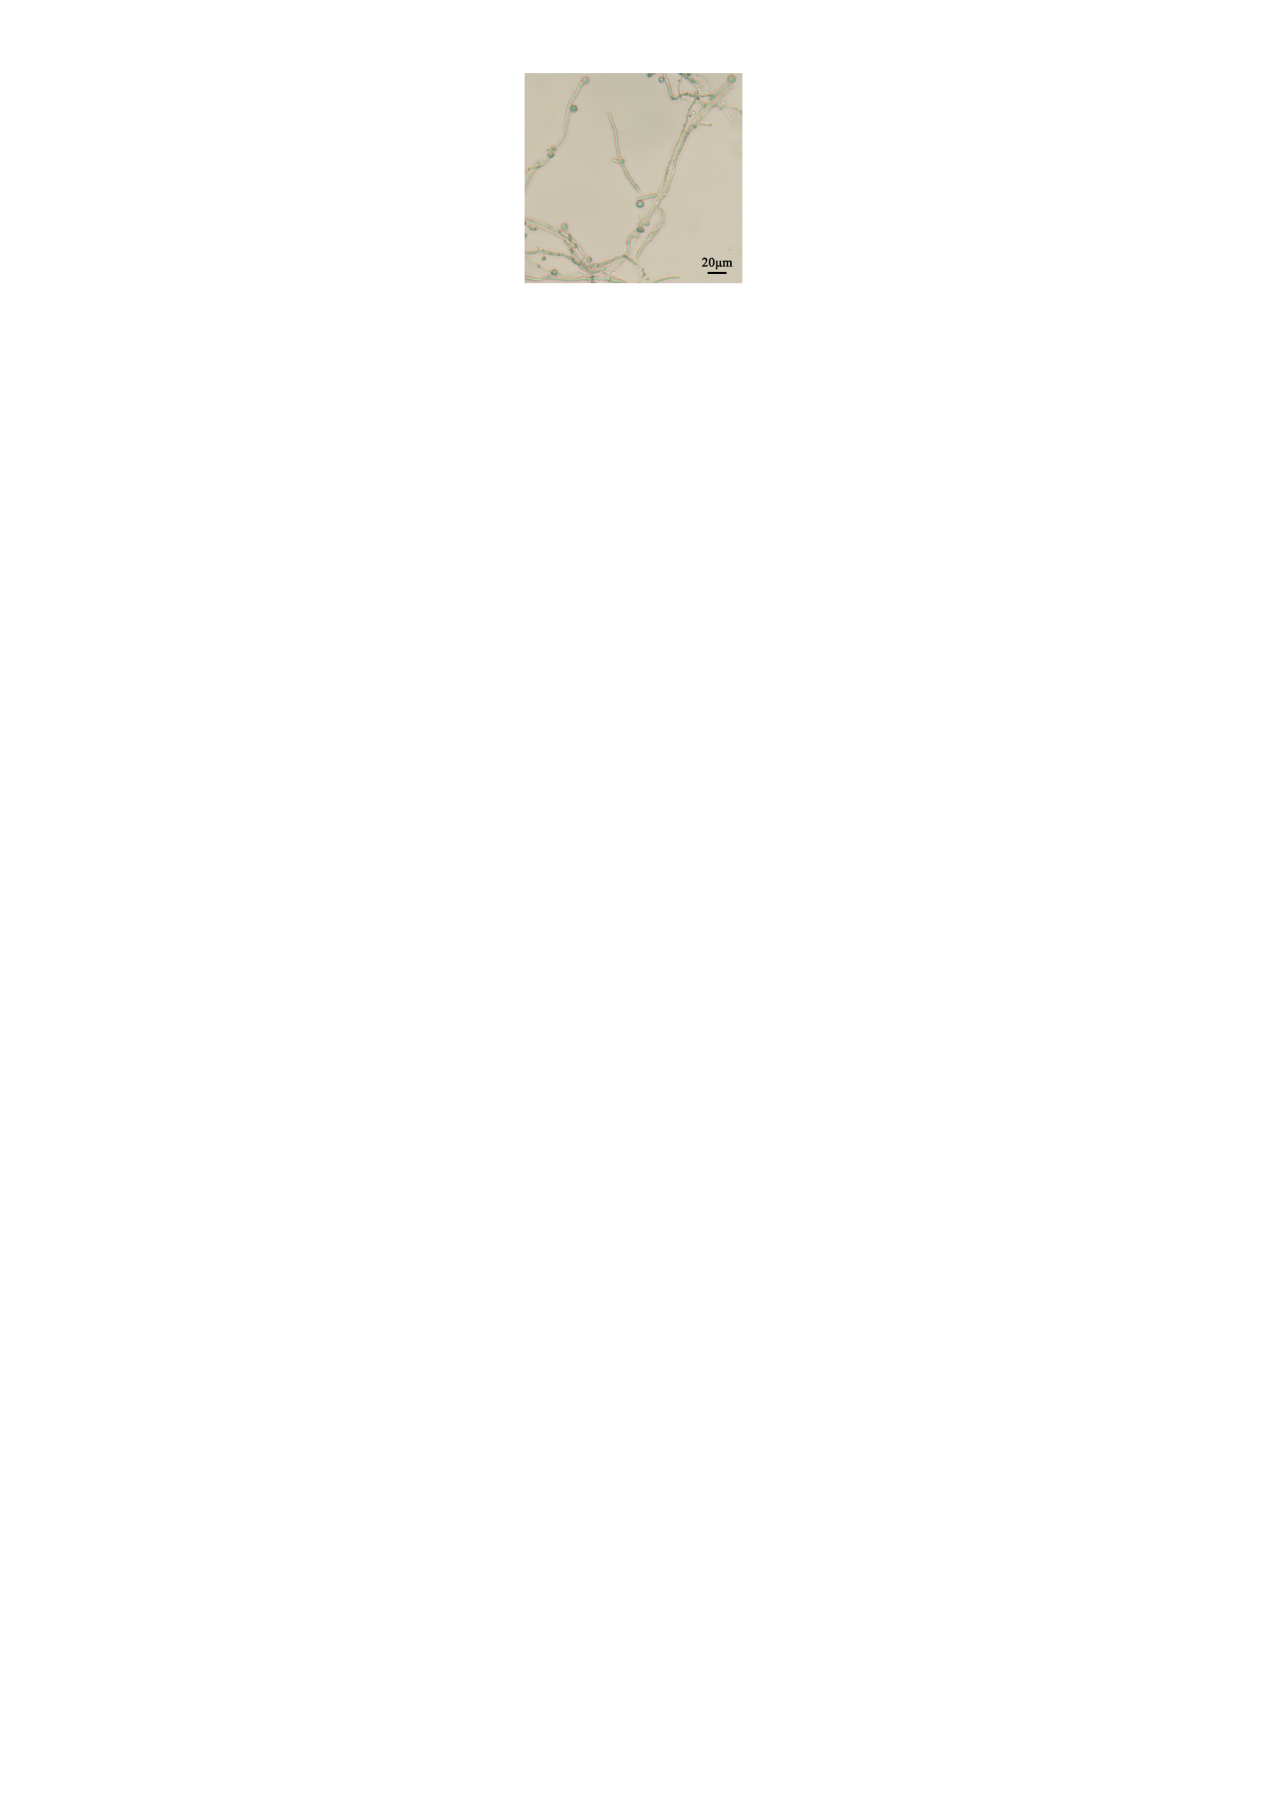


**Supplementary Figure S2** The microscope examination showing protoplasts begin to produce after digested at 30 ℃ for 0.5 h. Bars: 20 µm.
