# Supplementary material for: High-Quality Genome Assembly, Genetic Transformation and Green Fluorescent Protein Labeling of <em>Lasiodiplodia theobromae </em>Strain LTTK16-3, a Fungal Pathogen of Chinese Hickory Canker
Source: Preprints.org preprint supplement (doi:10.20944/preprints202307.0260.v1), 2023-07-05
Supplement: Supplementary file 5 [file Supplementary Table S1.docx]

| **Primer** | **Sequence(5’-3’)** | **Relevant Characteristics** |
| --- | --- | --- |
| Actin-GFP-F | ACTCACTATAGGGCGAATTGGGTACTCAAATTGGTTCGACAGCACTGCCGACGCTG | PCR primers to amplify *LtActin* fragment used for construction of the LtActin-GFP vector |
| Actin-GFP-R | CACCACCCCGGTGAACAGCTCCTCGCCCTTGCTCACGAAGCACTTGCGGTGGACAATG |
| Actin-GFP-ID-F | GGTCGTGATCTTACCGACTACC | PCR primers for the identification of the in-frame LtActin-GFP fusion vector from yeast |
| Actin-GFP-ID-R | GACACGCTGAACTTGTGGCCGTT |
| H1-GFP-F | ACTCACTATAGGGCGAATTGGGTACTCAAATTGGTTGAGACGGGTTGCCCGACTTC | PCR primers to amplify *LtH1* fragment used for construction of the LtH1-GFP vector |
| H1-GFP-R | CACCACCCCGGTGAACAGCTCCTCGCCCTTGCTCACAGCCTTGGTATCAGCCTCGGC |
| H1-GFP-ID-F | GCTGACACGACTGTACAGCCG | PCR primers for the identification of the in-frame LtH1-GFP fusion vector from yeast |
| H1-GFP-ID-R | GACACGCTGAACTTGTGGCCGTT |

**Supplementary** **Table S1** **Primers used in this study and their relevant characteristics.**
