# Supplementary material for: High-Quality Genome Assembly, Genetic Transformation and Green Fluorescent Protein Labeling of <em>Lasiodiplodia theobromae </em>Strain LTTK16-3, a Fungal Pathogen of Chinese Hickory Canker
Source: Preprints.org preprint supplement (doi:10.20944/preprints202307.0260.v1), 2023-07-05
Supplement: Supplementary file 7 [file Supplementary Table S2.xlsx]

## Sheet: Sheet1
The Kyoto Encyclopedia of Genes and Genomes (KEGG) analysis of 8818 core orthologous protein clusters of five Botryosphaeriaceae species
KEGG_A_class	KEGG_B_class	Pathway	out (1697)	All (1957)	p value	Pathway ID
Genetic Information Processing	Translation	Ribosome	105	110	0.00179678	ko03010
Genetic Information Processing	Transcription	Basal transcription factors	30	30	0.0134208	ko03022
Genetic Information Processing	Transcription	RNA polymerase	29	29	0.0155128	ko03020
Genetic Information Processing	Replication and repair	Nucleotide excision repair	42	43	0.0157153	ko03420
Genetic Information Processing	Folding, sorting and degradation	RNA degradation	48	50	0.028569	ko03018
Genetic Information Processing	Replication and repair	DNA replication	36	37	0.0329909	ko03030
Genetic Information Processing	Replication and repair	Mismatch repair	23	23	0.0369334	ko03430
Organismal Systems	Immune system	NOD-like receptor signaling pathway	19	19	0.0657469	ko04621
Metabolism	Carbohydrate metabolism	Starch and sucrose metabolism	67	72	0.0673446	ko00500
Metabolism	Lipid metabolism	Sphingolipid metabolism	25	26	0.120755	ko00600
Metabolism	Xenobiotics biodegradation and metabolism	Benzoate degradation	13	13	0.155783	ko00362
Genetic Information Processing	Replication and repair	Base excision repair	22	23	0.168791	ko03410
Genetic Information Processing	Translation	Aminoacyl-tRNA biosynthesis	38	41	0.184929	ko00970
Metabolism	Nucleotide metabolism	Purine metabolism	61	67	0.191979	ko00230
Genetic Information Processing	Replication and repair	Homologous recombination	20	21	0.209749	ko03440
Metabolism	Metabolism of cofactors and vitamins	Nicotinate and nicotinamide metabolism	19	20	0.233337	ko00760
Metabolism	Metabolism of cofactors and vitamins	Thiamine metabolism	18	19	0.259189	ko00730
Metabolism	Metabolism of other amino acids	Glutathione metabolism	41	45	0.2659	ko00480
Metabolism	Carbohydrate metabolism	Galactose metabolism	25	27	0.283067	ko00052
Genetic Information Processing	Folding, sorting and degradation	Protein export	17	18	0.287442	ko03060
Genetic Information Processing	Folding, sorting and degradation	Proteasome	32	35	0.296453	ko03050
Genetic Information Processing	Transcription	Spliceosome	81	91	0.317206	ko03040
Genetic Information Processing	Replication and repair	Non-homologous end-joining	8	8	0.318987	ko03450
Genetic Information Processing	Folding, sorting and degradation	Sulfur relay system	8	8	0.318987	ko04122
Metabolism	Metabolism of cofactors and vitamins	Porphyrin metabolism	22	24	0.363033	ko00860
Metabolism	Energy metabolism	Carbon fixation pathways in prokaryotes	14	15	0.387757	ko00720
Metabolism	Energy metabolism	Oxidative phosphorylation	68	77	0.415795	ko00190
Organismal Systems	Environmental adaptation	Plant-pathogen interaction	6	6	0.424654	ko04626
Metabolism	Amino acid metabolism	Histidine metabolism	19	21	0.457425	ko00340
Metabolism	Lipid metabolism	Ether lipid metabolism	12	13	0.468272	ko00565
Metabolism	Carbohydrate metabolism	C5-Branched dibasic acid metabolism	5	5	0.489908	ko00660
Metabolism	Nucleotide metabolism	Pyrimidine metabolism	31	35	0.494326	ko00240
Metabolism	Lipid metabolism	Glycerophospholipid metabolism	37	42	0.50737	ko00564
Metabolism	Amino acid metabolism	Lysine biosynthesis	11	12	0.512584	ko00300
Metabolism	Lipid metabolism	Biosynthesis of unsaturated fatty acids	11	12	0.512584	ko01040
Metabolism	Carbohydrate metabolism	Inositol phosphate metabolism	29	33	0.548619	ko00562
Metabolism	Metabolism of other amino acids	Selenocompound metabolism	10	11	0.559415	ko00450
Metabolism	Glycan biosynthesis and metabolism	Other glycan degradation	10	11	0.559415	ko00511
Metabolism	Global and overview maps	Fatty acid metabolism	41	47	0.564283	ko01212
Metabolism	Metabolism of cofactors and vitamins	Riboflavin metabolism	16	18	0.564449	ko00740
Metabolism	Biosynthesis of other secondary metabolites	Monobactam biosynthesis	4	4	0.565145	ko00261
Metabolism	Glycan biosynthesis and metabolism	O-Antigen nucleotide sugar biosynthesis	4	4	0.565145	ko00541
Metabolism	Carbohydrate metabolism	Fructose and mannose metabolism	40	46	0.587413	ko00051
Environmental Information Processing	Signal transduction	Two-component system	27	31	0.60433	ko02020
Metabolism	Lipid metabolism	Fatty acid elongation	9	10	0.608495	ko00062
Metabolism	Lipid metabolism	Glycerolipid metabolism	39	45	0.610595	ko00561
Metabolism	Biosynthesis of other secondary metabolites	Caffeine metabolism	3	3	0.651885	ko00232
Metabolism	Metabolism of terpenoids and polyketides	Geraniol degradation	3	3	0.651885	ko00281
Metabolism	Glycan biosynthesis and metabolism	Mannose type O-glycan biosynthesis	3	3	0.651885	ko00515
Metabolism	Biosynthesis of other secondary metabolites	Neomycin, kanamycin and gentamicin biosynthesis	3	3	0.651885	ko00524
Cellular Processes	Cellular community - prokaryotes	Biofilm formation - Pseudomonas aeruginosa	3	3	0.651885	ko02025
Metabolism	Lipid metabolism	Arachidonic acid metabolism	8	9	0.659415	ko00590
Metabolism	Biosynthesis of other secondary metabolites	Streptomycin biosynthesis	13	15	0.679374	ko00521
Metabolism	Lipid metabolism	Fatty acid degradation	35	41	0.702212	ko00071
Metabolism	Carbohydrate metabolism	Citrate cycle (TCA cycle)	29	34	0.707415	ko00020
Metabolism	Metabolism of cofactors and vitamins	Ubiquinone and other terpenoid-quinone biosynthesis	12	14	0.718071	ko00130
Metabolism	Biosynthesis of other secondary metabolites	Carbapenem biosynthesis	2	2	0.751879	ko00332
Metabolism	Metabolism of terpenoids and polyketides	Carotenoid biosynthesis	2	2	0.751879	ko00906
Metabolism	Xenobiotics biodegradation and metabolism	Toluene degradation	11	13	0.756297	ko00623
Metabolism	Metabolism of other amino acids	Taurine and hypotaurine metabolism	6	7	0.764203	ko00430
Metabolism	Metabolism of cofactors and vitamins	Vitamin B6 metabolism	6	7	0.764203	ko00750
Metabolism	Energy metabolism	Sulfur metabolism	21	25	0.769212	ko00920
Metabolism	Carbohydrate metabolism	Pentose phosphate pathway	31	37	0.787876	ko00030
Metabolism	Metabolism of cofactors and vitamins	Folate biosynthesis	15	18	0.791061	ko00790
Metabolism	Energy metabolism	Nitrogen metabolism	20	24	0.7947	ko00910
Metabolism	Global and overview maps	2-Oxocarboxylic acid metabolism	41	49	0.806145	ko01210
Metabolism	Xenobiotics biodegradation and metabolism	Aminobenzoate degradation	35	42	0.815047	ko00627
Metabolism	Metabolism of cofactors and vitamins	One carbon pool by folate	14	17	0.819898	ko00670
Cellular Processes	Cellular community - prokaryotes	Quorum sensing	14	17	0.819898	ko02024
Metabolism	Lipid metabolism	Steroid biosynthesis	24	29	0.822095	ko00100
Metabolism	Amino acid metabolism	Tryptophan metabolism	51	61	0.823027	ko00380
Metabolism	Xenobiotics biodegradation and metabolism	Styrene degradation	23	28	0.842472	ko00643
Metabolism	Metabolism of terpenoids and polyketides	Terpenoid backbone biosynthesis	23	28	0.842472	ko00900
Metabolism	Amino acid metabolism	Phenylalanine metabolism	43	52	0.857771	ko00360
Metabolism	Amino acid metabolism	Phenylalanine, tyrosine and tryptophan biosynthesis	27	33	0.862118	ko00400
Metabolism	Metabolism of other amino acids	Cyanoamino acid metabolism	27	33	0.862118	ko00460
Metabolism	Xenobiotics biodegradation and metabolism	Chlorocyclohexane and chlorobenzene degradation	8	10	0.863095	ko00361
Metabolism	Xenobiotics biodegradation and metabolism	Fluorobenzoate degradation	4	5	0.866093	ko00364
Metabolism	Biosynthesis of other secondary metabolites	Staurosporine biosynthesis	4	5	0.866093	ko00404
Metabolism	Metabolism of other amino acids	Phosphonate and phosphinate metabolism	4	5	0.866093	ko00440
Metabolism	Biosynthesis of other secondary metabolites	Novobiocin biosynthesis	1	1	0.867144	ko00401
Metabolism	Biosynthesis of other secondary metabolites	Phenazine biosynthesis	1	1	0.867144	ko00405
Metabolism	Metabolism of terpenoids and polyketides	Polyketide sugar unit biosynthesis	1	1	0.867144	ko00523
Metabolism	Biosynthesis of other secondary metabolites	Acarbose and validamycin biosynthesis	1	1	0.867144	ko00525
Metabolism	Metabolism of terpenoids and polyketides	Biosynthesis of ansamycins	1	1	0.867144	ko01051
Metabolism	Metabolism of terpenoids and polyketides	Biosynthesis of vancomycin group antibiotics	1	1	0.867144	ko01055
Metabolism	Metabolism of terpenoids and polyketides	Biosynthesis of enediyne antibiotics	1	1	0.867144	ko01059
Cellular Processes	Cellular community - prokaryotes	Biofilm formation - Escherichia coli	1	1	0.867144	ko02026
Environmental Information Processing	Membrane transport	Bacterial secretion system	1	1	0.867144	ko03070
Metabolism	Xenobiotics biodegradation and metabolism	Drug metabolism - other enzymes	31	38	0.878881	ko00983
Metabolism	Lipid metabolism	Fatty acid biosynthesis	21	26	0.879834	ko00061
Metabolism	Xenobiotics biodegradation and metabolism	Chloroalkane and chloroalkene degradation	20	25	0.896655	ko00625
Metabolism	Metabolism of terpenoids and polyketides	Sesquiterpenoid and triterpenoid biosynthesis	3	4	0.912105	ko00909
Metabolism	Xenobiotics biodegradation and metabolism	Dioxin degradation	19	24	0.912148	ko00621
Metabolism	Xenobiotics biodegradation and metabolism	Polycyclic aromatic hydrocarbon degradation	19	24	0.912148	ko00624
Metabolism	Amino acid metabolism	Alanine, aspartate and glutamate metabolism	38	47	0.916063	ko00250
Metabolism	Amino acid metabolism	Valine, leucine and isoleucine degradation	42	52	0.925608	ko00280
Metabolism	Energy metabolism	Carbon fixation in photosynthetic organisms	22	28	0.932425	ko00710
Metabolism	Amino acid metabolism	Cysteine and methionine metabolism	51	63	0.934597	ko00270
Metabolism	Global and overview maps	Carbon metabolism	120	145	0.93966	ko01200
Metabolism	Carbohydrate metabolism	Amino sugar and nucleotide sugar metabolism	50	62	0.94139	ko00520
Metabolism	Metabolism of terpenoids and polyketides	Limonene and pinene degradation	5	7	0.946118	ko00903
Metabolism	Metabolism of cofactors and vitamins	Biotin metabolism	12	16	0.949679	ko00780
Metabolism	Metabolism of other amino acids	D-Amino acid metabolism	2	3	0.951867	ko00470
Metabolism	Lipid metabolism	Linoleic acid metabolism	2	3	0.951867	ko00591
Metabolism	Metabolism of cofactors and vitamins	Lipoic acid metabolism	2	3	0.951867	ko00785
Metabolism	Biosynthesis of other secondary metabolites	Biosynthesis of various plant secondary metabolites	20	26	0.952724	ko00999
Metabolism	Lipid metabolism	alpha-Linolenic acid metabolism	8	11	0.953062	ko00592
Metabolism	Global and overview maps	Biosynthesis of amino acids	131	159	0.96003	ko01230
Metabolism	Glycan biosynthesis and metabolism	Other types of O-glycan biosynthesis	4	6	0.96592	ko00514
Cellular Processes	Cell growth and death	Cell cycle - Caulobacter	4	6	0.96592	ko04112
Metabolism	Amino acid metabolism	Arginine and proline metabolism	59	74	0.970637	ko00330
Metabolism	Biosynthesis of other secondary metabolites	Prodigiosin biosynthesis	10	14	0.971189	ko00333
Metabolism	Carbohydrate metabolism	Ascorbate and aldarate metabolism	21	28	0.97527	ko00053
Metabolism	Xenobiotics biodegradation and metabolism	Naphthalene degradation	29	38	0.977526	ko00626
Metabolism	Amino acid metabolism	Arginine biosynthesis	20	27	0.980118	ko00220
Metabolism	Carbohydrate metabolism	Propanoate metabolism	20	27	0.980118	ko00640
Metabolism	Metabolism of cofactors and vitamins	Pantothenate and CoA biosynthesis	24	32	0.980499	ko00770
Metabolism	Xenobiotics biodegradation and metabolism	Atrazine degradation	3	5	0.981124	ko00791
Metabolism	Amino acid metabolism	Lysine degradation	28	37	0.981318	ko00310
Metabolism	Biosynthesis of other secondary metabolites	Penicillin and cephalosporin biosynthesis	1	2	0.982408	ko00311
Metabolism	Carbohydrate metabolism	Butanoate metabolism	23	31	0.984201	ko00650
Metabolism	Amino acid metabolism	Glycine, serine and threonine metabolism	54	69	0.984477	ko00260
Metabolism	Carbohydrate metabolism	Pentose and glucuronate interconversions	35	46	0.986166	ko00040
Metabolism	Carbohydrate metabolism	Pyruvate metabolism	61	78	0.988932	ko00620
Metabolism	Carbohydrate metabolism	Glyoxylate and dicarboxylate metabolism	47	61	0.989003	ko00630
Metabolism	Amino acid metabolism	Tyrosine metabolism	56	72	0.989367	ko00350
Metabolism	Energy metabolism	Methane metabolism	25	34	0.989891	ko00680
Metabolism	Amino acid metabolism	Valine, leucine and isoleucine biosynthesis	17	24	0.990594	ko00290
Environmental Information Processing	Membrane transport	ABC transporters	13	19	0.991802	ko02010
Metabolism	Metabolism of other amino acids	beta-Alanine metabolism	22	31	0.995077	ko00410
Metabolism	Carbohydrate metabolism	Glycolysis / Gluconeogenesis	49	65	0.996488	ko00010
Metabolism	Global and overview maps	Biosynthesis of secondary metabolites	475	577	0.99989	ko01110
Metabolism	Xenobiotics biodegradation and metabolism	Caprolactam degradation	17	28	0.9999	ko00930
Metabolism	Global and overview maps	Microbial metabolism in diverse environments	253	317	0.999944	ko01120
Metabolism	Global and overview maps	Metabolic pathways	1138	1343	0.999969	ko01100
Metabolism	Global and overview maps	Degradation of aromatic compounds	49	71	0.999982	ko01220
