# Supplementary material for: High-Quality Genome Assembly, Genetic Transformation and Green Fluorescent Protein Labeling of <em>Lasiodiplodia theobromae </em>Strain LTTK16-3, a Fungal Pathogen of Chinese Hickory Canker
Source: Preprints.org preprint supplement (doi:10.20944/preprints202307.0260.v1), 2023-07-05
Supplement: Supplementary file 9 [file Supplementary Table S3.xlsx]

## Sheet: Sheet1
Bidirectional BLAST analysis of LTTK16-3 stain specific proteins in the other four Chinese hickory trunk canker related Botryosphaeria strains
query	orthologous proteins in Botryosphaeria cortices	orthologous proteins in Botryosphaeria dothidea	orthologous proteins in Botryosphaeria fabicerciana	orthologous proteins in Botryosphaeria qingyuanensis
jg711.t1	BCTK_00007056-RA	-	BFLG_00007884-RA	-
jg1002.t1	BCTK_00007056-RA	BDLA_00007957-RA	BFLG_00007883-RA	BQTK_00006646-RA
jg1068.t1	BCTK_00007452-RA	BDLA_00001611-RA	BFLG_00001609-RA	BQTK_00000221-RA
jg1068.t2	BCTK_00000228-RA	BDLA_00001611-RA	BFLG_00001609-RA	BQTK_00000221-RA
jg10891.t1	BCTK_00005774-RA	BDLA_00011944-RA	BFLG_00005787-RA	BQTK_00010291-RA
jg10891.t2	BCTK_00004671-RA	BDLA_00011944-RA	BFLG_00009990-RA	BQTK_00010291-RA
jg1122.t1	BCTK_00004369-RA	BDLA_00003699-RA	BFLG_00007131-RA	BQTK_00008779-RA
jg1122.t2	BCTK_00004369-RA	BDLA_00003699-RA	BFLG_00007131-RA	BQTK_00008779-RA
jg12005.t1	-	-	-	-
jg12005.t2	-	-	-	-
jg12005.t3	-	-	-	-
jg12461.t1	BCTK_00010702-RA	BDLA_00009296-RA	BFLG_00011634-RA	BQTK_00008674-RA
jg12468.t1	BCTK_00000371-RA	BDLA_00010782-RA	BFLG_00010900-RA	BQTK_00000355-RA
jg12468.t2	BCTK_00000371-RA	BDLA_00010782-RA	BFLG_00010900-RA	BQTK_00000355-RA
jg12469.t1	BCTK_00007639-RA	BDLA_00007370-RA	BFLG_00007302-RA	BQTK_00008015-RA
jg12485.t1	-	-	-	-
jg12492.t1	-	-	-	-
jg12500.t1	BCTK_00007639-RA	BDLA_00007370-RA	BFLG_00007302-RA	BQTK_00008015-RA
jg12509.t1	BCTK_00010702-RA	BDLA_00009296-RA	BFLG_00011634-RA	BQTK_00008674-RA
jg2752.t1	BCTK_00009111-RA	BDLA_00008870-RA	BFLG_00008136-RA	BQTK_00008285-RA
jg370.t1	-	-	-	-
jg370.t2	-	-	-	-
jg3715.t1	BCTK_00009111-RA	BDLA_00008870-RA	BFLG_00008136-RA	BQTK_00008285-RA
jg4939.t1	BCTK_00003792-RA	BDLA_00003407-RA	BFLG_00003792-RA	BQTK_00001540-RA
jg4939.t2	BCTK_00003792-RA	BDLA_00003407-RA	BFLG_00003792-RA	BQTK_00001540-RA
jg5367.t1	-	-	-	-
jg5367.t2	-	-	-	-
jg710.t1	BCTK_00007056-RA	BDLA_00007957-RA	BFLG_00007883-RA	BQTK_00006646-RA
jg712.t1	BCTK_00007056-RA	BDLA_00007957-RA	BFLG_00007883-RA	BQTK_00006646-RA
jg7471.t1	BCTK_00003766-RA	BDLA_00004307-RA	BFLG_00003765-RA	-
jg7471.t2	BCTK_00003766-RA	BDLA_00004307-RA	BFLG_00003765-RA	-
jg7833.t1	-	-	-	-
jg7833.t2	-	-	-	-
jg916.t2	BCTK_00007028-RA	BDLA_00007981-RA	BFLG_00007910-RA	BQTK_00006619-RA
jg916.t3	BCTK_00007028-RA	BDLA_00007981-RA	BFLG_00007910-RA	BQTK_00006619-RA
jg9520.t1	BCTK_00004463-RA	BDLA_00008316-RA	BFLG_00008688-RA	BQTK_00007809-RA
jg9520.t2	-	BDLA_00008316-RA	BFLG_00008688-RA	-
jg9921.t1	BCTK_00010776-RA	BDLA_00009224-RA	BFLG_00001871-RA	BQTK_00001781-RA
jg9921.t2	BCTK_00010776-RA	BDLA_00009224-RA	BFLG_00001871-RA	BQTK_00001781-RA
Bidirectional BLAST analysis of orthologous proteins of 39 LTTK16-3 strain specific proteins in the other four Chinese hickory trunk canker related Botryosphaeria strains, "-" represents no orthologues.
